# Supplementary material for: LC-MS and GC-MS Data Fusion Metabolomics Profiling Coupled with Multivariate Analysis for the Discrimination of Different Parts of Faustrime Fruit and Evaluation of Their Antioxidant Activity
Source: MDPI journal article supplement (doi:10.3390/antiox12030565), 2023-02-24
Supplement: s1 [file s1]

## Supplementary Material

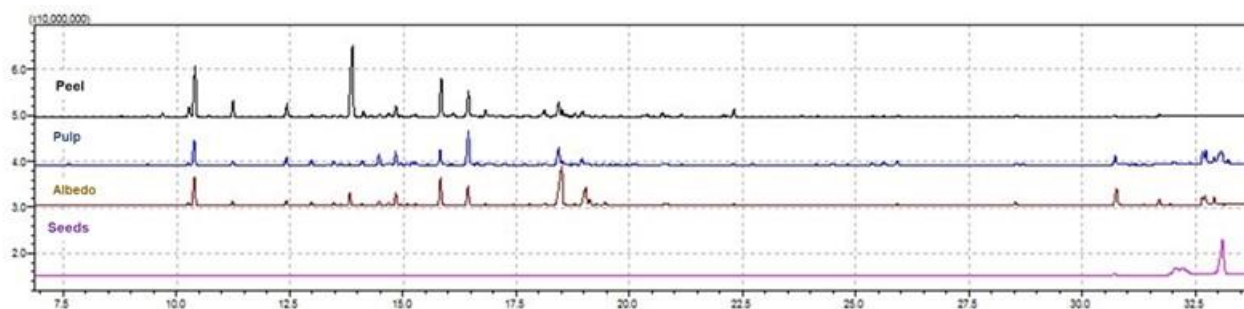

Figure S1. GC-MS Profiles of PPAS parts n-hexane extracts

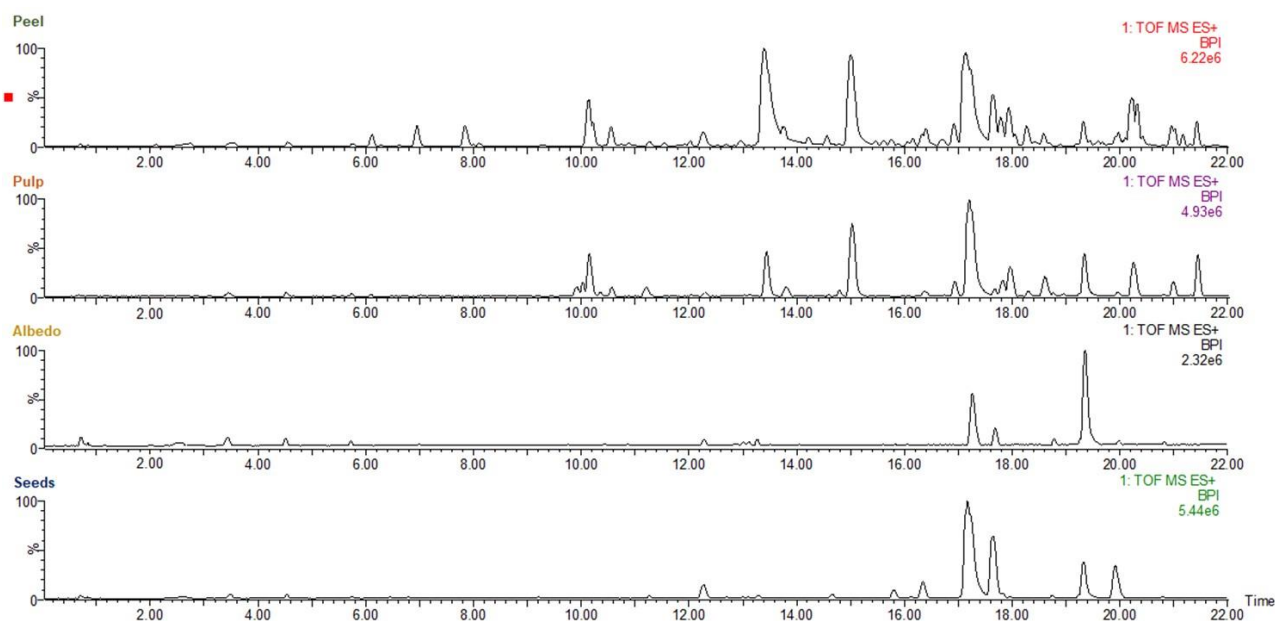

Figure S2. UPLC-HRMS profiles of PPAS parts chloroform extracts

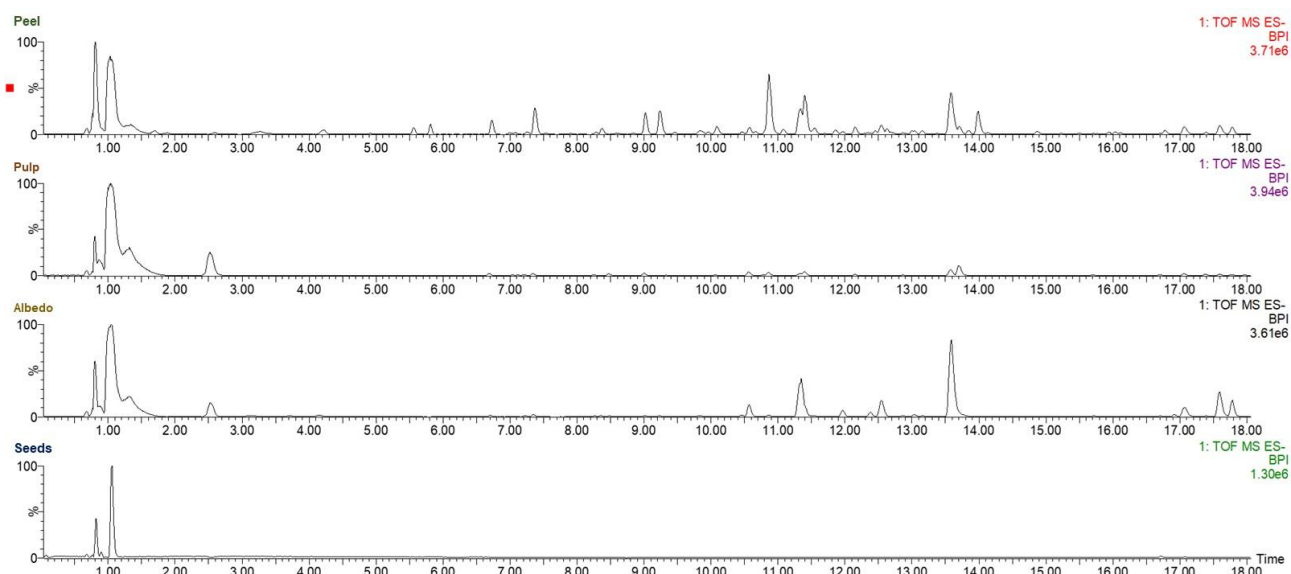

Figure S3. UPLC-HRMS profiles of PPAS parts methanol/water (50% v/v) extracts

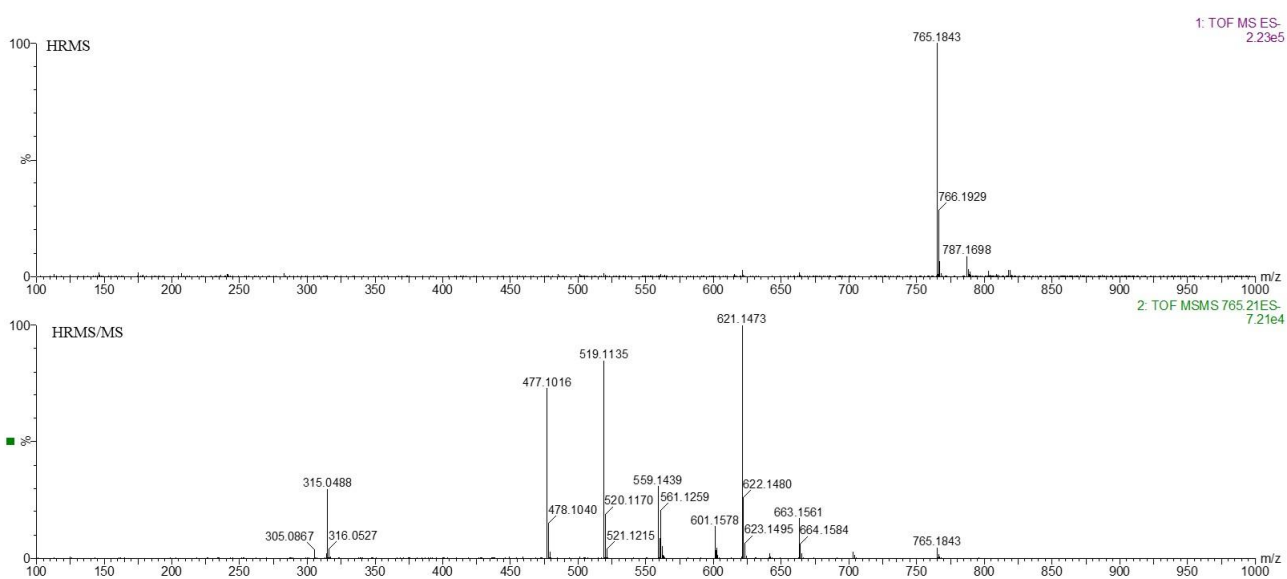

Figure S4. MS/HRMS spectra of compound 91



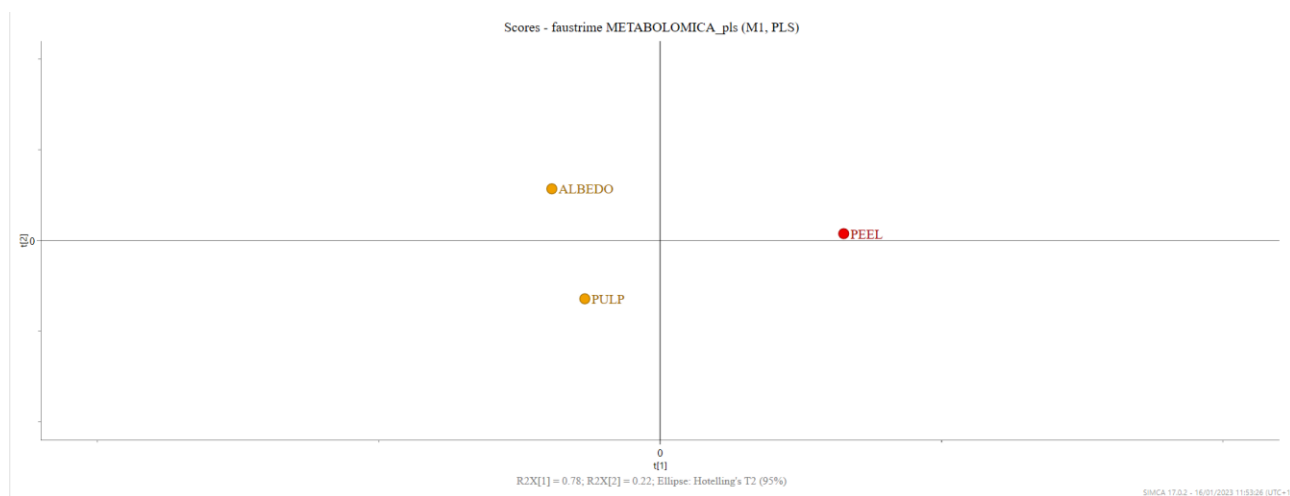

Figure S8. PLS Score Plot

Table S1. Calibration curves for semi-quantitative analysis

| Compounds  | Linearity ( $\mu\text{g mL}^{-1}$ ) | Calibration Equation   | R <sup>2</sup> |
|------------|-------------------------------------|------------------------|----------------|
| rutin      | 0.1-50                              | $Y=182.694x - 36.526$  | 0.9997         |
| eriocitrin | 0.1-50                              | $Y=428.088x - 20.987$  | 0.9999         |
| quercetin  | 0.1-50                              | $Y=265.73x - 181.44$   | 0.9969         |
| coumarin   | 0.1-50                              | $Y=1254.7x - 177.710$  | 0.9999         |
| luteolin   | 0.1-50                              | $Y=456.827 - 219.854$  | 0.9985         |
| naringenin | 0.1-50                              | $Y=754.721x - 99.974$  | 0.9999         |
| apigenin   | 0.1-50                              | $Y=668.092x - 143.878$ | 0.9999         |
| hesperetin | 0.1-50                              | $Y=799.606x - 186.279$ | 0.9997         |
